# Supplementary material for: Tracking Cell Recruitment and Behavior within the Tumor Microenvironment Using Advanced Intravital Imaging Approaches
Source: Cells. 2018 Jul 3;7(7):69. doi: 10.3390/cells7070069 (PMC6071013; doi:10.3390/cells7070069)
Supplement: Supplementary file 1 [file cells-07-00069-s001.zip]

Archive with 13 entries (13 files):
- Figure 1.pdf
- Figure 2.pdf
- Figure 3.pdf
- Figure 4.pdf
- Figure 5.pdf
- Figure 6.pdf
- Video S1.mp4
- Video S2.mp4
- Video S3.mp4
- Video S4.mp4
- Video S5.mp4
- Video S6.mp4
- Video S7.mp4
