# Supplementary material for: Tracking Cell Recruitment and Behavior within the Tumor Microenvironment Using Advanced Intravital Imaging Approaches
Source: Cells. 2018 Jul 3;7(7):69. doi: 10.3390/cells7070069 (PMC6071013; doi:10.3390/cells7070069)
Supplement: Supplementary file 1 [file cells-07-00069-s001.zip › Figure 4.pdf]

Figure 4

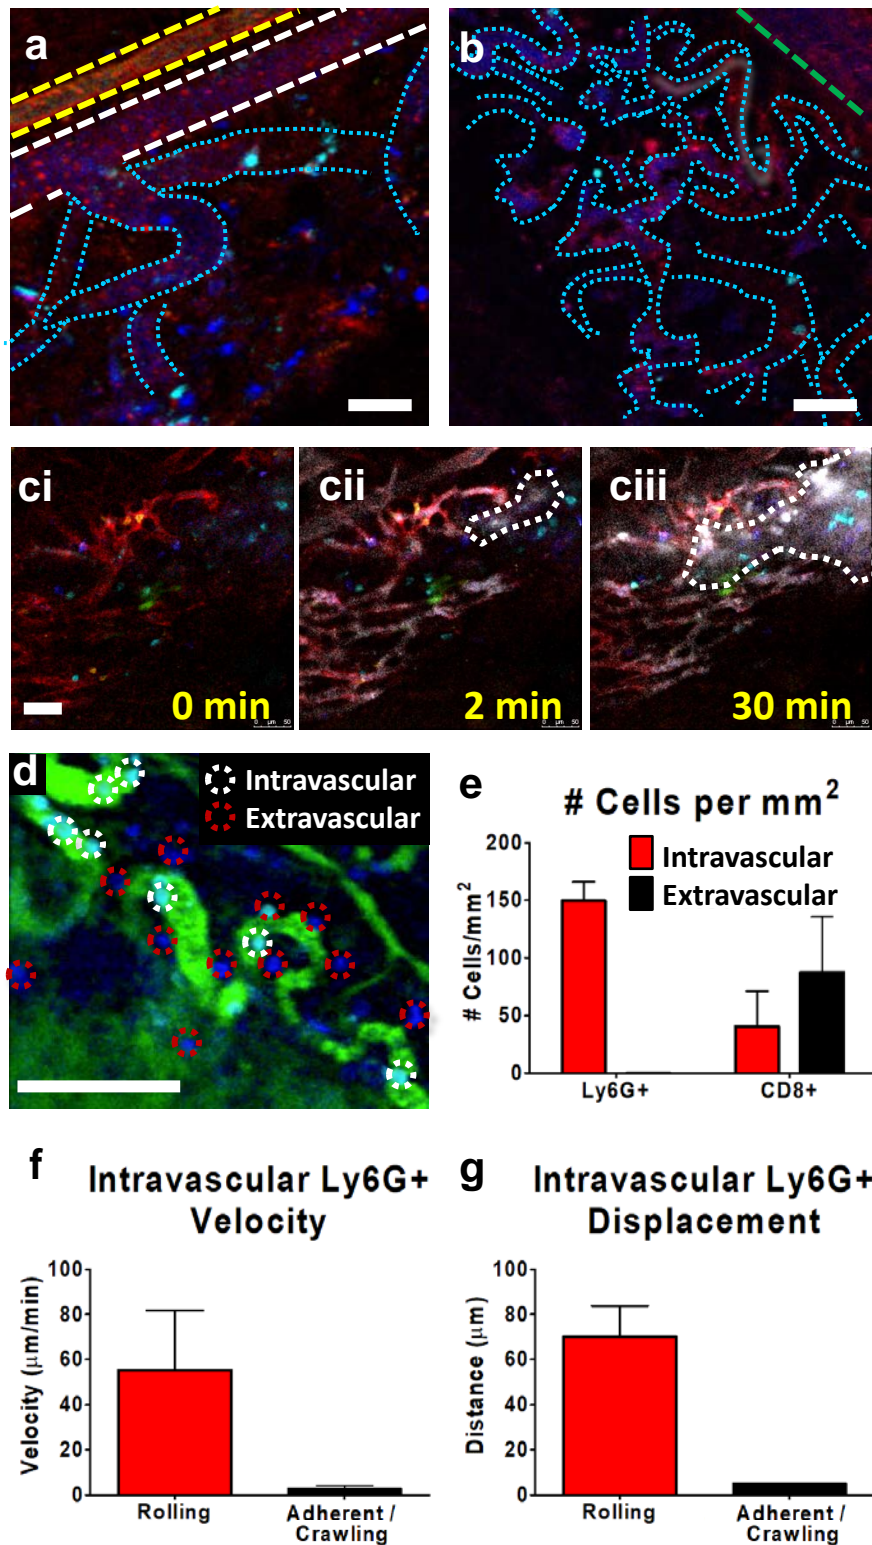

**Figure 4.** Characterization of subcutaneous CT-26 tumour microvasculature and leukocyte behaviour. Representative IVM images (**a-c**) show the tumour microvasculature. Vasculature is highlighted by the presence of circulating platelets (red; PE-conjugated anti-CD49b), neutrophils (cyan; BV421-conjugated Ly6G) and CD8+ leukocytes (blue; eFluor 660-conjugated anti-CD8) (**a, b**). Using resonant-scanning confocal microscopy, arterioles (yellow outline, **a**), veins (green outline, **b**) are seen as parallel unbranching structures. Venules are seen as narrower than veins and appear as branching vessels (white outline, **a**) whereas capillaries/tumour microvasculature appear as very narrow, convoluted vessels (cyan outline, **a-b**). Intravenous administration of fluorescent nanoparticles (Q-tracker; grey) identifies areas of vascular leakage and accumulation of dye in the tissue interstitium (outlined in dotted white line) (**ci-ciii**). Introduction of FITC-conjugated albumin (green) allows for easy determination of intravascular (red circles) or extravascular (white circles) leukocytes (**d**). Quantification of intravascular (red) or extravascular (black) neutrophils (Ly6G+) and cytotoxic T cells (CD8+) (cells present for  $\geq 3$  min) within the tumour microvasculature (**e**). Velocity (**f**) and displacement (**g**) of rolling and adherent/crawling neutrophils as measured over a 10 min imaging period in a subcutaneous CT-26 tumour.  $n = 3$  animals. Data displayed as the mean  $\pm$  SEM. Total cell counts normalized for the area of each region of interest within in each image (i.e. vessel vs. extravascular tissue). White scale bar represents 50  $\mu$ m. Images in (**a, b, c, d**) were captured using resonant-scanning confocal microscopy.
