# Supplementary material for: Tracking Cell Recruitment and Behavior within the Tumor Microenvironment Using Advanced Intravital Imaging Approaches
Source: Cells. 2018 Jul 3;7(7):69. doi: 10.3390/cells7070069 (PMC6071013; doi:10.3390/cells7070069)
Supplement: Supplementary file 1 [file cells-07-00069-s001.zip › Figure 5.pdf]

Figure 5

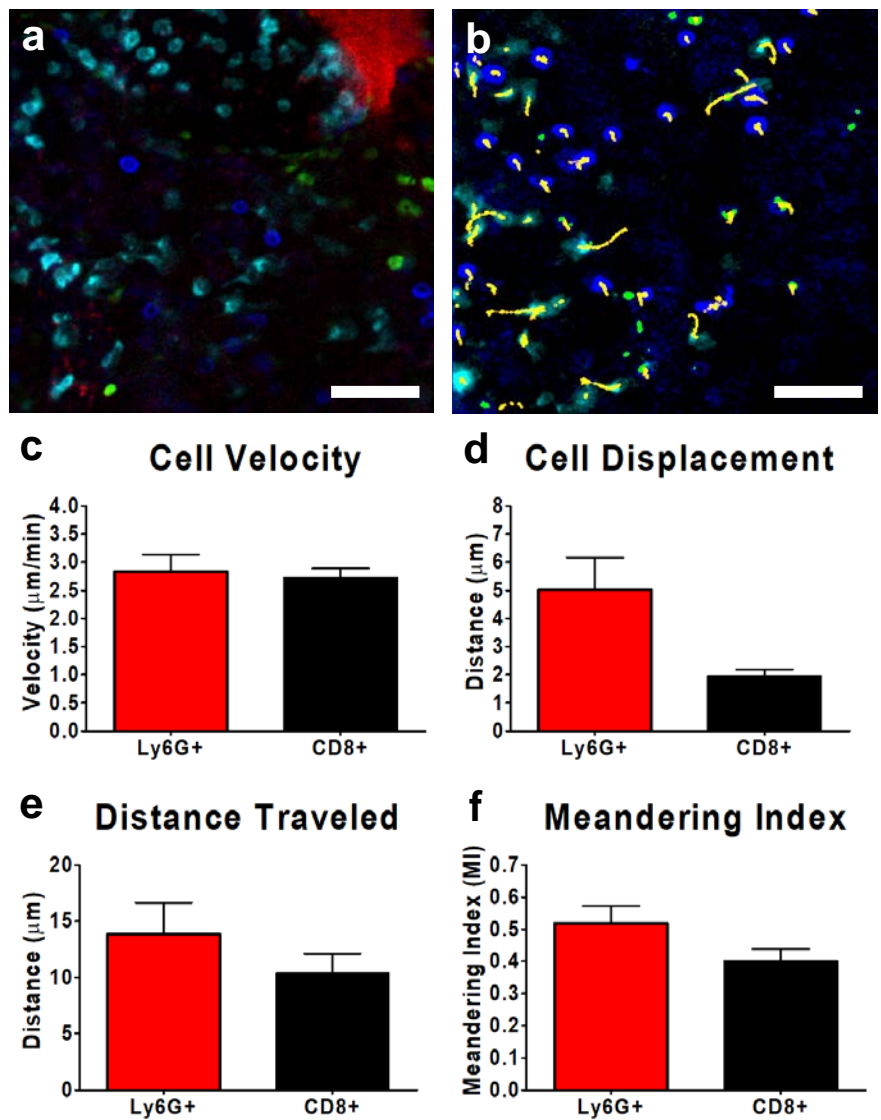

**Figure 5.** Characterization of interstitial leukocyte behaviour within the TME of a subcutaneous CD-26 tumour. Representative resonant-scanning confocal images of the tumour interstitium (a-b); tumour cells (red), neutrophils (cyan; BV421-conjugated Ly6G) and CD8+ leukocytes (blue; eFluor 660-conjugated anti-CD8) (a, b). Cell movement was tracked over a 10 min imaging window (yellow tracks) for at least 3 separate fields of view and quantified (b). Leukocyte velocity (c), displacement from initial starting point (d), distance travelled (e), and meandering index (f) were measured for each of the neutrophils (red) and CD8+ T cells (black). n = 3 animals. Between 8-50 Ly6G+ cells were tracked in each field of view where as only 0-4 CD8+ cells were visualized per field of view. Data displayed as the mean  $\pm$  SEM. White scale bar represents 50  $\mu\text{m}$ . Images in (a, b) were capture using resonant-scanning confocal microscopy.
